# Supplementary material for: Pilot-scale evaluation of the sustainability of membrane desalination systems for the concentrate volume minimization of coal chemical wastewater
Source: Royal Society of Chemistry journal article supplement (doi:10.1039/d3ew00476g), 2023-11-03
Supplement: d3ew00476g1.pdf [file d3ew00476g1.pdf]

**Pilot-scale evaluation of the sustainability of membrane desalination systems for  
concentrate volume minimization of coal chemical wastewater**

Fayuan Chen<sup>a\*</sup>, Linnan Ma<sup>a</sup>, Zhong Zhang<sup>b</sup>, Xiao Wang<sup>c</sup>, Qinghong Wang<sup>a</sup>,  
Xiaolong Wang<sup>d</sup>, Chunmao Chen<sup>a</sup>, Linyu Jiang<sup>e</sup>, Xianhui Li<sup>b\*</sup>

<sup>a</sup> *State Key Laboratory of Heavy Oil Processing, State Key Laboratory of Petroleum  
Pollution Control, China University of Petroleum-Beijing, Beijing 102249, China*

<sup>b</sup> *Key Laboratory for City Cluster Environmental Safety and Green Development of the  
Ministry of Education, School of Ecology, Environment and Resources, Guangdong  
University of Technology, Guangzhou 510006, China*

<sup>c</sup> *State Key Laboratory of Water Resource Protection and Utilization in Coal Mining,  
China Energy Investment, Beijing, 102211, P.R. China*

<sup>d</sup> *Ningxia Ningdong Xingrong Water Treatment Co., Ltd., Yinchuan, 750041, P.R. China*

<sup>e</sup> *Xiamen Jiarong Technology Co., Ltd., Xiamen, 361000, P.R. China*

**Corresponding Author**

**Fayuan, Chen**

*State Key Laboratory of Heavy Oil Processing, State Key Laboratory of Petroleum  
Pollution Control, China University of Petroleum-Beijing, Beijing 102249, China*

**fychen@cup.edu.cn**

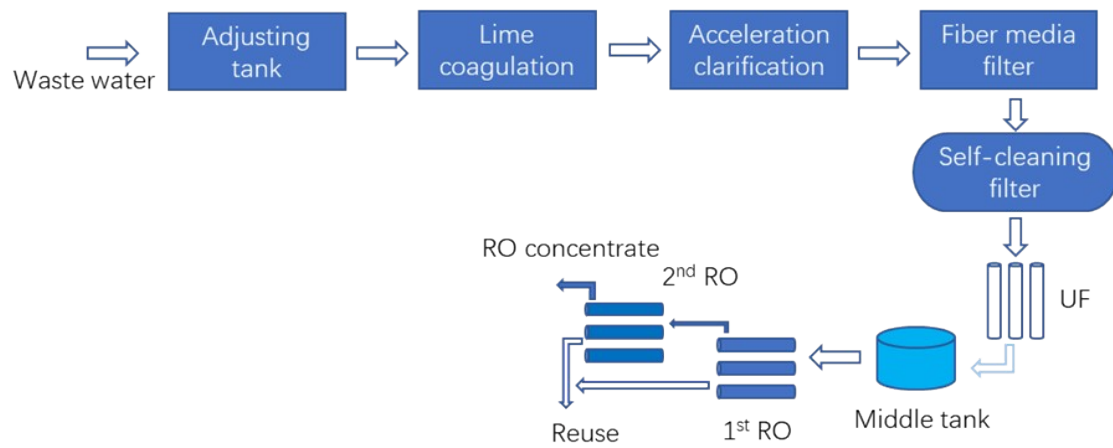

**Fig. S1.** The schematic diagram of wastewater reclamation plant for a coal chemistry industry.

**Table S1. Membrane parameters in VSEP scenario**

| <b>Item</b>                                    | <b>VESP</b>         |
|------------------------------------------------|---------------------|
| <b>Manufacturer</b>                            | DOW                 |
| <b>Membrane Model</b>                          | RO-11               |
| <b>Membrane material</b>                       | Composite Polyamide |
| <b>Water permeability (LMH)</b>                | 40                  |
| <b>Membrane effective area (m<sup>2</sup>)</b> | 120                 |
| <b>Operating temperature (°C)</b>              | 60                  |
| <b>Range of feed pH</b>                        | 2-10                |
| <b>Operational pressure (bar)</b>              | 70                  |
| <b>Rejection (%)</b>                           | 99.7%               |

**Table S2. Membrane parameters in DTRO scenario**

| <b>Item</b>                                    | <b>DTRO</b>                     |
|------------------------------------------------|---------------------------------|
| <b>Manufacturer</b>                            | Unisol Membrane Technology GmbH |
| <b>Model Number</b>                            | MP-DT-RO3                       |
| <b>Membrane material</b>                       | Composite Polyamide             |
| <b>Water permeability</b>                      | 29                              |
| <b>Membrane effective area (m<sup>2</sup>)</b> | 9.405                           |
| <b>Operating temperature (°C)</b>              | ≤ 45                            |
| <b>Range of feed pH</b>                        | 2–12                            |
| <b>Operational pressure (bar)</b>              | ≤ 90                            |
| <b>Rejection (%)</b>                           | ≥97.5%                          |

**Table S3. Membrane parameters in FO-RO scenario**

| <b>Item</b>                                    | <b>FO</b>                  | <b>RO-1</b>            | <b>RO-2</b>            | <b>RO-3</b>            |
|------------------------------------------------|----------------------------|------------------------|------------------------|------------------------|
| <b>Manufacturer</b>                            | FTS                        | FTS                    | Dow                    | Dow                    |
| <b>Model Number</b>                            | FO-CTA-<br>8040-45-<br>VDS | HBCR-TFC-<br>4040      | SW30- 8040             | BW30- 8040             |
| <b>Membrane material</b>                       | CTA                        | Composite<br>Polyamide | Composite<br>Polyamide | Composite<br>Polyamide |
| <b>Water permeability</b>                      |                            | 150 LMH                | 32                     | 45                     |
| <b>Membrane effective area (m<sup>2</sup>)</b> | 9.9                        | 37                     | 37                     | 37                     |
| <b>Operating temperature (°C)</b>              | ≤ 40                       | 30                     | 45                     | 45                     |
| <b>Range of feed pH</b>                        | 4-7.5                      | 3-10                   | 2-11                   | 2-11                   |
| <b>Operational pressure (bar)</b>              | < 10                       | < 80                   | 83                     | 41                     |
| <b>Rejection</b>                               | 99.9%                      | 60%                    | 99.6                   | 99.5                   |

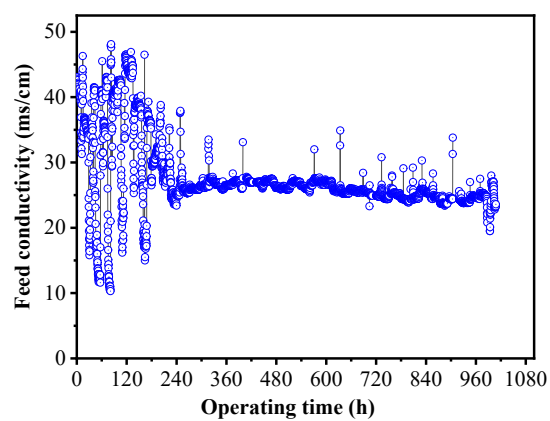

**Fig. S2. Feed conductivity of the FO system**

**Table S4. Details of chemical cost in the VSEP scenario**

| <b>Item</b>                                     | <b>Consumption per ton of feed water (kg/m<sup>3</sup>)</b> | <b>Price USD (\$)</b> | <b>Operating cost per ton of feed water</b> | <b>Note</b>                        |
|-------------------------------------------------|-------------------------------------------------------------|-----------------------|---------------------------------------------|------------------------------------|
| Hydrochloric acid (30%)                         | 1.0                                                         | 0.046                 | 0.046                                       | Adjusting pH to 6.5                |
| Antiscalant                                     | 0.009                                                       | 3.51                  | 0.0032                                      | 5 ppm                              |
| Acid cleaning-Citric acid                       | 0.0035                                                      | 2.46                  | 0.0172                                      | Cleaning frequency: Once a week,1% |
| Alkaline cleaning -Sodium hydroxide             | 0.034                                                       | 0.62                  | 0.0042                                      | Once a week,0.1%                   |
| Alkaline cleaning -metal chelating agent (EDTA) | 0.0035                                                      | 4.31                  | 0.0030                                      | Once a week,1%                     |

Since the statistical data came from the year of 2021, the CNY was converted into USD by the annual average exchange rate (1 USD = 6.5 CNY) in 2021 ([National Bureau of Statistics of China \(NBSC\), 2021](#)).

**Table S5. Details of chemical cost in the DTRO scenario**

| <b>Item</b>                                        | <b>Consumption per ton of water (kg/m<sup>3</sup>)</b> | <b>USD (\$)</b> | <b>Operating cost per ton of water</b> | <b>Note</b>                       |
|----------------------------------------------------|--------------------------------------------------------|-----------------|----------------------------------------|-----------------------------------|
| Hydrochloric acid (30%)                            | 1.0                                                    | 0.046           | 0.046                                  | Adjusting pH of feed water to 6.5 |
| Antiscalant                                        | 0.009                                                  | 3.51            | 0.0032                                 | 5 ppm                             |
| Acid cleaning-Citric acid                          | 0.0035                                                 | 2.46            | 0.0172                                 | Once a week,1%                    |
| Alkaline cleaning<br>-Sodium hydroxide             | 0.034                                                  | 0.62            | 0.0042                                 | Once a week,0.1%                  |
| Alkaline cleaning<br>-metal chelating agent (EDTA) | 0.0035                                                 | 4.31            | 0.0030                                 | Once a week,1%                    |



**Table S6. Details of chemical cost in the FO-RO scenario**

| <b>Item</b>             | <b>Consumption per ton of water (kg/m<sup>3</sup>)</b> | <b>USD (\$/kg)</b> | <b>Operating cost per ton of water</b> | <b>Note</b>                              |
|-------------------------|--------------------------------------------------------|--------------------|----------------------------------------|------------------------------------------|
| Hydrochloric acid (30%) | 1.0                                                    | 0.046              | 0.046                                  | Adjusting pH                             |
| Sodium chloride         | 0.777                                                  | 0.238              | 0.185                                  | Supplemental draw solution concentration |
